# Supplementary material for: Silylation of laponite clay particles with monofunctional and trifunctional vinyl alkoxysilanes
Source: Royal Society of Chemistry journal article supplement (doi:10.1039/b415618h), 2004-12-13
Supplement: b415618h.pdf [file b415618h.pdf]

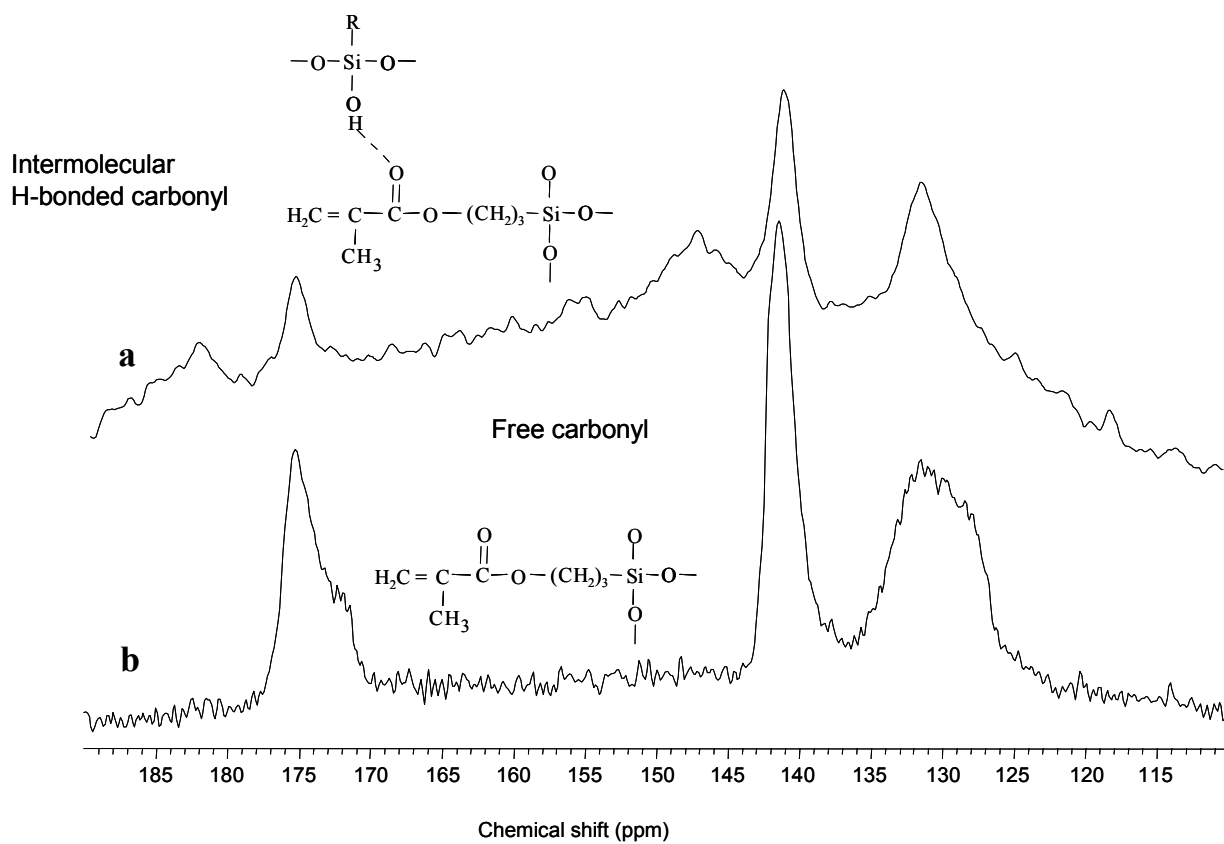

**Figure 1.**  $^{13}\text{C}$  CPMAS NMR spectra of a) MPDES-grafted laponite and b) MPTMS-grafted laponite.

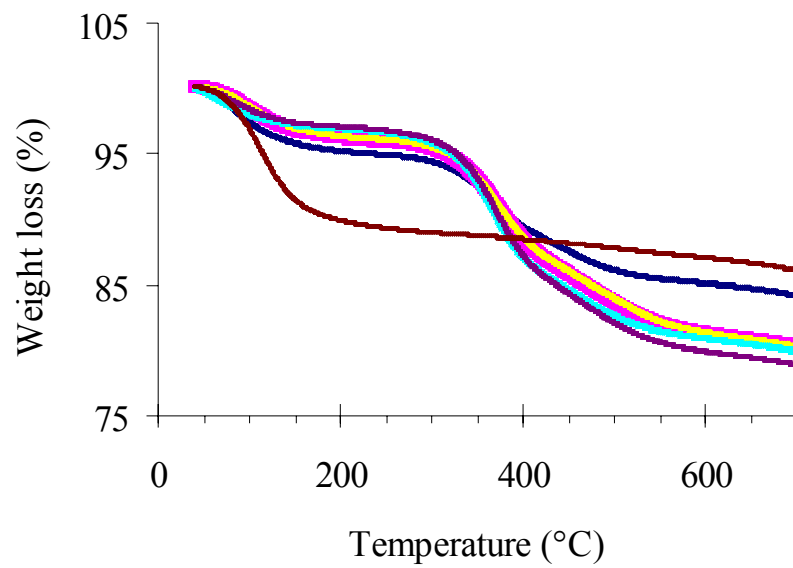

**Figure 2.** TGA graphs of bare laponite (bottom) and laponite that has been reacted with increasing amounts of MPTMS coupling agent.

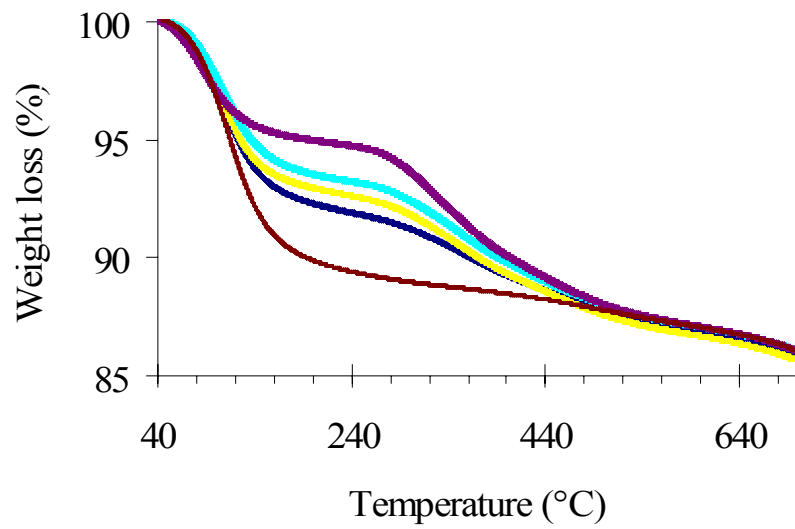

**Figure 3.** TGA graphs of bare laponite (bottom) and laponite that has been reacted with increasing amounts of MPDES coupling agent.
